# Supplementary material for: Sibling mortality burden in low-income countries: A descriptive analysis of sibling death in Africa, Asia, and Latin America and the Caribbean
Source: PubMed Central journal article supplement (PMC7556453; doi:10.1371/journal.pone.0236498), 2020-10-14
Supplement: pone.0236498.s001.pdf [file pone.0236498.s001.pdf]

**SI Table. List of countries, surveys, and corresponding samples and estimates**

|                        | Year of survey | Analytic sample size of women 15-34 yrs old | Total % ever had at least one sibling die | % Born to bereaved mother | % Had sibling die during lifetime |
|------------------------|----------------|---------------------------------------------|-------------------------------------------|---------------------------|-----------------------------------|
| <b>Western Africa</b>  |                |                                             |                                           |                           |                                   |
| Benin                  | 2017-18        | 10,923                                      | 25.4                                      | 8.3                       | 20.8                              |
| Burkina Faso           | 2010           | 7,339                                       | 50.4                                      | 20.6                      | 38.7                              |
| Cameroon               | 2011           | 7,921                                       | 52.0                                      | 21.1                      | 40.9                              |
| Cote d'Ivoire          | 2011-12        | 5,093                                       | 44.7                                      | 17.2                      | 35.0                              |
| Gambia                 | 2013           | 6,054                                       | 31.6                                      | 13.8                      | 23.7                              |
| Guinea                 | 2012           | 4,611                                       | 48.3                                      | 20.3                      | 38.8                              |
| Liberia                | 2013           | 4,803                                       | 33.6                                      | 13.5                      | 26.2                              |
| Mali                   | 2012-13        | 5,346                                       | 21.3                                      | 5.5                       | 16.5                              |
| Niger                  | 2012           | 5,460                                       | 61.7                                      | 27.6                      | 51.4                              |
| Nigeria                | 2013           | 20,731                                      | 33.3                                      | 12.6                      | 27.0                              |
| Senegal                | 2017           | 11,536                                      | 33.1                                      | 14.3                      | 23.7                              |
| Sierra Leone           | 2013           | 9,131                                       | 28.8                                      | 9.1                       | 24.2                              |
| Togo                   | 2013-14        | 4,889                                       | 40.4                                      | 17.0                      | 30.4                              |
| <b>Central Africa</b>  |                |                                             |                                           |                           |                                   |
| Chad                   | 2014-15        | 11,107                                      | 48.1                                      | 14.8                      | 42.3                              |
| Congo                  | 2011-12        | 4,782                                       | 39.4                                      | 12.0                      | 31.7                              |
| DRC*                   | 2013-14        | 10,679                                      | 48.5                                      | 16.8                      | 41.3                              |
| Gabon                  | 2012           | 4,215                                       | 35.1                                      | 11.9                      | 25.1                              |
| Sao Tome Principe      | 2008-09        | 907                                         | 40.5                                      | 14.6                      | 29.3                              |
| <b>Eastern Africa</b>  |                |                                             |                                           |                           |                                   |
| Burundi                | 2016-17        | 11,410                                      | 53.1                                      | 22.7                      | 41.5                              |
| Comoros                | 2012           | 2,834                                       | 26.1                                      | 11.8                      | 16.1                              |
| Ethiopia               | 2016+          | 10,497                                      | 39.7                                      | 14.5                      | 28.4                              |
| Kenya                  | 2014           | 8,260                                       | 24.9                                      | 7.6                       | 20.4                              |
| Madagascar             | 2008-09        | 6,803                                       | 34.3                                      | 12.5                      | 27.0                              |
| Rwanda                 | 2014-15        | 7,853                                       | 54.9                                      | 23.1                      | 43.7                              |
| Tanzania               | 2015-16        | 8,031                                       | 35.6                                      | 14.3                      | 27.9                              |
| Uganda                 | 2016           | 12,286                                      | 49.0                                      | 18.7                      | 35.7                              |
| <b>Southern Africa</b> |                |                                             |                                           |                           |                                   |
| Angola                 | 2015-16        | 9,624                                       | 28.1                                      | 7.2                       | 17.1                              |
| Eswatini               | 2006-07        | 1,771                                       | 26.9                                      | 6.7                       | 23.2                              |
| Lesotho                | 2014           | 3,914                                       | 31.8                                      | 11.0                      | 25.7                              |
| Malawi                 | 2015-16        | 15,458                                      | 33.3                                      | 11.2                      | 25.6                              |
| Namibia                | 2013           | 4,799                                       | 22.3                                      | 5.8                       | 18.6                              |

|                                          |         |        |      |      |      |
|------------------------------------------|---------|--------|------|------|------|
| South Africa                             | 2016    | 4,825  | 12.6 | 2.5  | 11.0 |
| Zambia                                   | 2013-14 | 9,194  | 33.3 | 10.2 | 28.3 |
| Zimbabwe                                 | 2015    | 5,911  | 26.2 | 6.1  | 23.0 |
| <b>South and southeast Asia</b>          |         |        |      |      |      |
| Cambodia                                 | 2014    | 8,910  | 30.3 | 15.1 | 19.8 |
| Myanmar                                  | 2015-16 | 6,325  | 30.6 | 13.6 | 21.8 |
| Nepal                                    | 2016    | 8,811  | 36.3 | 21.2 | 20.5 |
| Timor-Leste                              | 2016    | 7,827  | 17.6 | 7.6  | 12.6 |
| <b>Latin America &amp; the Caribbean</b> |         |        |      |      |      |
| Bolivia                                  | 2008    | 5,801  | 16.5 | 9.6  | 7.9  |
| Colombia                                 | 2015-16 | 21,616 | 11.1 | 3.6  | 6.6  |
| Guatemala                                | 2014-15 | 15,132 | 33.1 | 18.1 | 20.0 |
| Haiti                                    | 2016-17 | 9,419  | 30.5 | 12.8 | 22.0 |
| Peru                                     | 2012    | 10,092 | 20.6 | 13.6 | 9.7  |

---

Source: Demographic and Health Survey, \*Democratic Republic of the Congo

+Gregorian calendar; data collected in 2008 according to the Ethiopian calendar
