# Supplementary material for: Sibling mortality burden in low-income countries: A descriptive analysis of sibling death in Africa, Asia, and Latin America and the Caribbean
Source: PubMed Central journal article supplement (PMC7556453; doi:10.1371/journal.pone.0236498), 2020-10-14
Supplement: pone.0236498.s002.pdf [file pone.0236498.s002.pdf]

**S2 Table 2. Additional characteristics of deceased siblings<sup>o</sup>**

|                        | Sample size<br>of deceased<br>sibling <sup>o</sup> | % Deceased<br>sibling<br>female | Siblings age at time of<br>death |     | % Deceased<br>sibling older<br>than focal<br>respondent |
|------------------------|----------------------------------------------------|---------------------------------|----------------------------------|-----|---------------------------------------------------------|
|                        |                                                    |                                 | Mean                             | SD  |                                                         |
| <b>Western Africa</b>  |                                                    |                                 |                                  |     |                                                         |
| Benin                  | 2,244                                              | 46.4                            | 10.5                             | 6.7 | 36.3                                                    |
| Burkina Faso           | 2,797                                              | 47.6                            | 8.4                              | 5.6 | 28.1                                                    |
| Cameroon               | 3,201                                              | 48.1                            | 9.0                              | 6.0 | 35.8                                                    |
| Cote d'Ivoire          | 1,850                                              | 48.9                            | 9.9                              | 6.1 | 35.1                                                    |
| Gambia                 | 1,437                                              | 46.1                            | 8.8                              | 6.2 | 34.5                                                    |
| Guinea                 | 1,809                                              | 44.9                            | 8.8                              | 5.8 | 32.1                                                    |
| Liberia                | 1,354                                              | 47.7                            | 9.7                              | 6.4 | 38.7                                                    |
| Mali                   | 843                                                | 49.5                            | 10.0                             | 6.6 | 40.3                                                    |
| Niger                  | 2,580                                              | 49.6                            | 7.5                              | 5.6 | 32.7                                                    |
| Nigeria                | 5,629                                              | 49.4                            | 8.9                              | 6.2 | 34.4                                                    |
| Senegal                | 2,737                                              | 46.1                            | 8.6                              | 6.1 | 37.6                                                    |
| Sierra Leone           | 2,157                                              | 50.5                            | 9.9                              | 6.3 | 39.8                                                    |
| Togo                   | 1,517                                              | 47.2                            | 9.1                              | 6.2 | 40.5                                                    |
| <b>Central Africa</b>  |                                                    |                                 |                                  |     |                                                         |
| Chad                   | 4,500                                              | 45.9                            | 9.1                              | 6.1 | 31.5                                                    |
| Congo                  | 1,612                                              | 49.2                            | 9.9                              | 6.2 | 38.8                                                    |
| DRC*                   | 4,461                                              | 45.6                            | 8.9                              | 6.0 | 33.7                                                    |
| Gabon                  | 1,136                                              | 48.5                            | 10.5                             | 6.5 | 45.2                                                    |
| Sao Tome Principe      | 293                                                | 48.7                            | 9.0                              | 5.9 | 34.1                                                    |
| <b>Eastern Africa</b>  |                                                    |                                 |                                  |     |                                                         |
| Burundi                | 4,454                                              | 45.3                            | 8.0                              | 5.9 | 37.4                                                    |
| Comoros                | 446                                                | 46.7                            | 9.3                              | 6.4 | 37.1                                                    |
| Ethiopia               | 2,995                                              | 47.0                            | 9.5                              | 6.4 | 41.6                                                    |
| Kenya                  | 1,730                                              | 48.2                            | 9.5                              | 6.7 | 50.9                                                    |
| Madagascar             | 1,798                                              | 48.9                            | 8.8                              | 5.7 | 36.2                                                    |
| Rwanda                 | 3,350                                              | 44.6                            | 7.1                              | 5.3 | 41.5                                                    |
| Tanzania               | 2,227                                              | 49.3                            | 9.5                              | 6.5 | 38.8                                                    |
| Uganda                 | 4,497                                              | 46.4                            | 9.2                              | 6.4 | 35.2                                                    |
| <b>Southern Africa</b> |                                                    |                                 |                                  |     |                                                         |
| Angola                 | 1,425                                              | 47.2                            | 10.7                             | 6.9 | 37.8                                                    |
| Eswatini               | 406                                                | 54.8                            | 11.7                             | 5.2 | 56.8                                                    |

|                                          |       |      |      |     |      |
|------------------------------------------|-------|------|------|-----|------|
| Lesotho                                  | 986   | 49.2 | 11.7 | 6.6 | 56.2 |
| Malawi                                   | 3,754 | 50.3 | 10.0 | 6.6 | 40.9 |
| Namibia                                  | 871   | 48.5 | 12.1 | 6.4 | 56.5 |
| South Africa                             | 582   | 49.2 | 14.1 | 6.7 | 69.9 |
| Zambia                                   | 2,611 | 53.4 | 10.3 | 6.6 | 48.2 |
| Zimbabwe                                 | 1,287 | 51.9 | 12.3 | 6.2 | 54.7 |
| <b>South and southeast Asia</b>          |       |      |      |     |      |
| Cambodia                                 | 1,669 | 44.3 | 7.9  | 6.0 | 40.8 |
| Myanmar                                  | 1,465 | 44.1 | 8.8  | 6.5 | 40.8 |
| Nepal                                    | 1,838 | 49.8 | 7.2  | 5.9 | 32.5 |
| Timor-Leste                              | 893   | 43.1 | 9.9  | 7.0 | 38.5 |
| <b>Latin America &amp; the Caribbean</b> |       |      |      |     |      |
| Bolivia                                  | 394   | 44.6 | 5.3  | 4.0 | 26.1 |
| Colombia                                 | 1,606 | 29.7 | 11.1 | 7.0 | 55.7 |
| Guatemala                                | 3,047 | 41.1 | 9.0  | 6.4 | 35.1 |
| Haiti                                    | 2,135 | 46.7 | 9.8  | 6.6 | 44.2 |
| Peru+                                    | 1,133 | 46.6 | 6.2  | 5.2 | --   |

Source: Demographic and Health Survey

°References first sibling deceased during respondents' lifetime; \*Democratic Republic of the Congo; + DHS Peru data do not feature in information on the year of birth of deceased siblings, but instead only the age at death, hence our inability to calculate the relative age of siblings to focal respondents
