# Supplementary material for: Sibling mortality burden in low-income countries: A descriptive analysis of sibling death in Africa, Asia, and Latin America and the Caribbean
Source: PubMed Central journal article supplement (PMC7556453; doi:10.1371/journal.pone.0236498), 2020-10-14

S1 Figure . Cumulative probability of experiencing a sibling die between ages 0 and 25 among young women in 43 countries, by world region and country

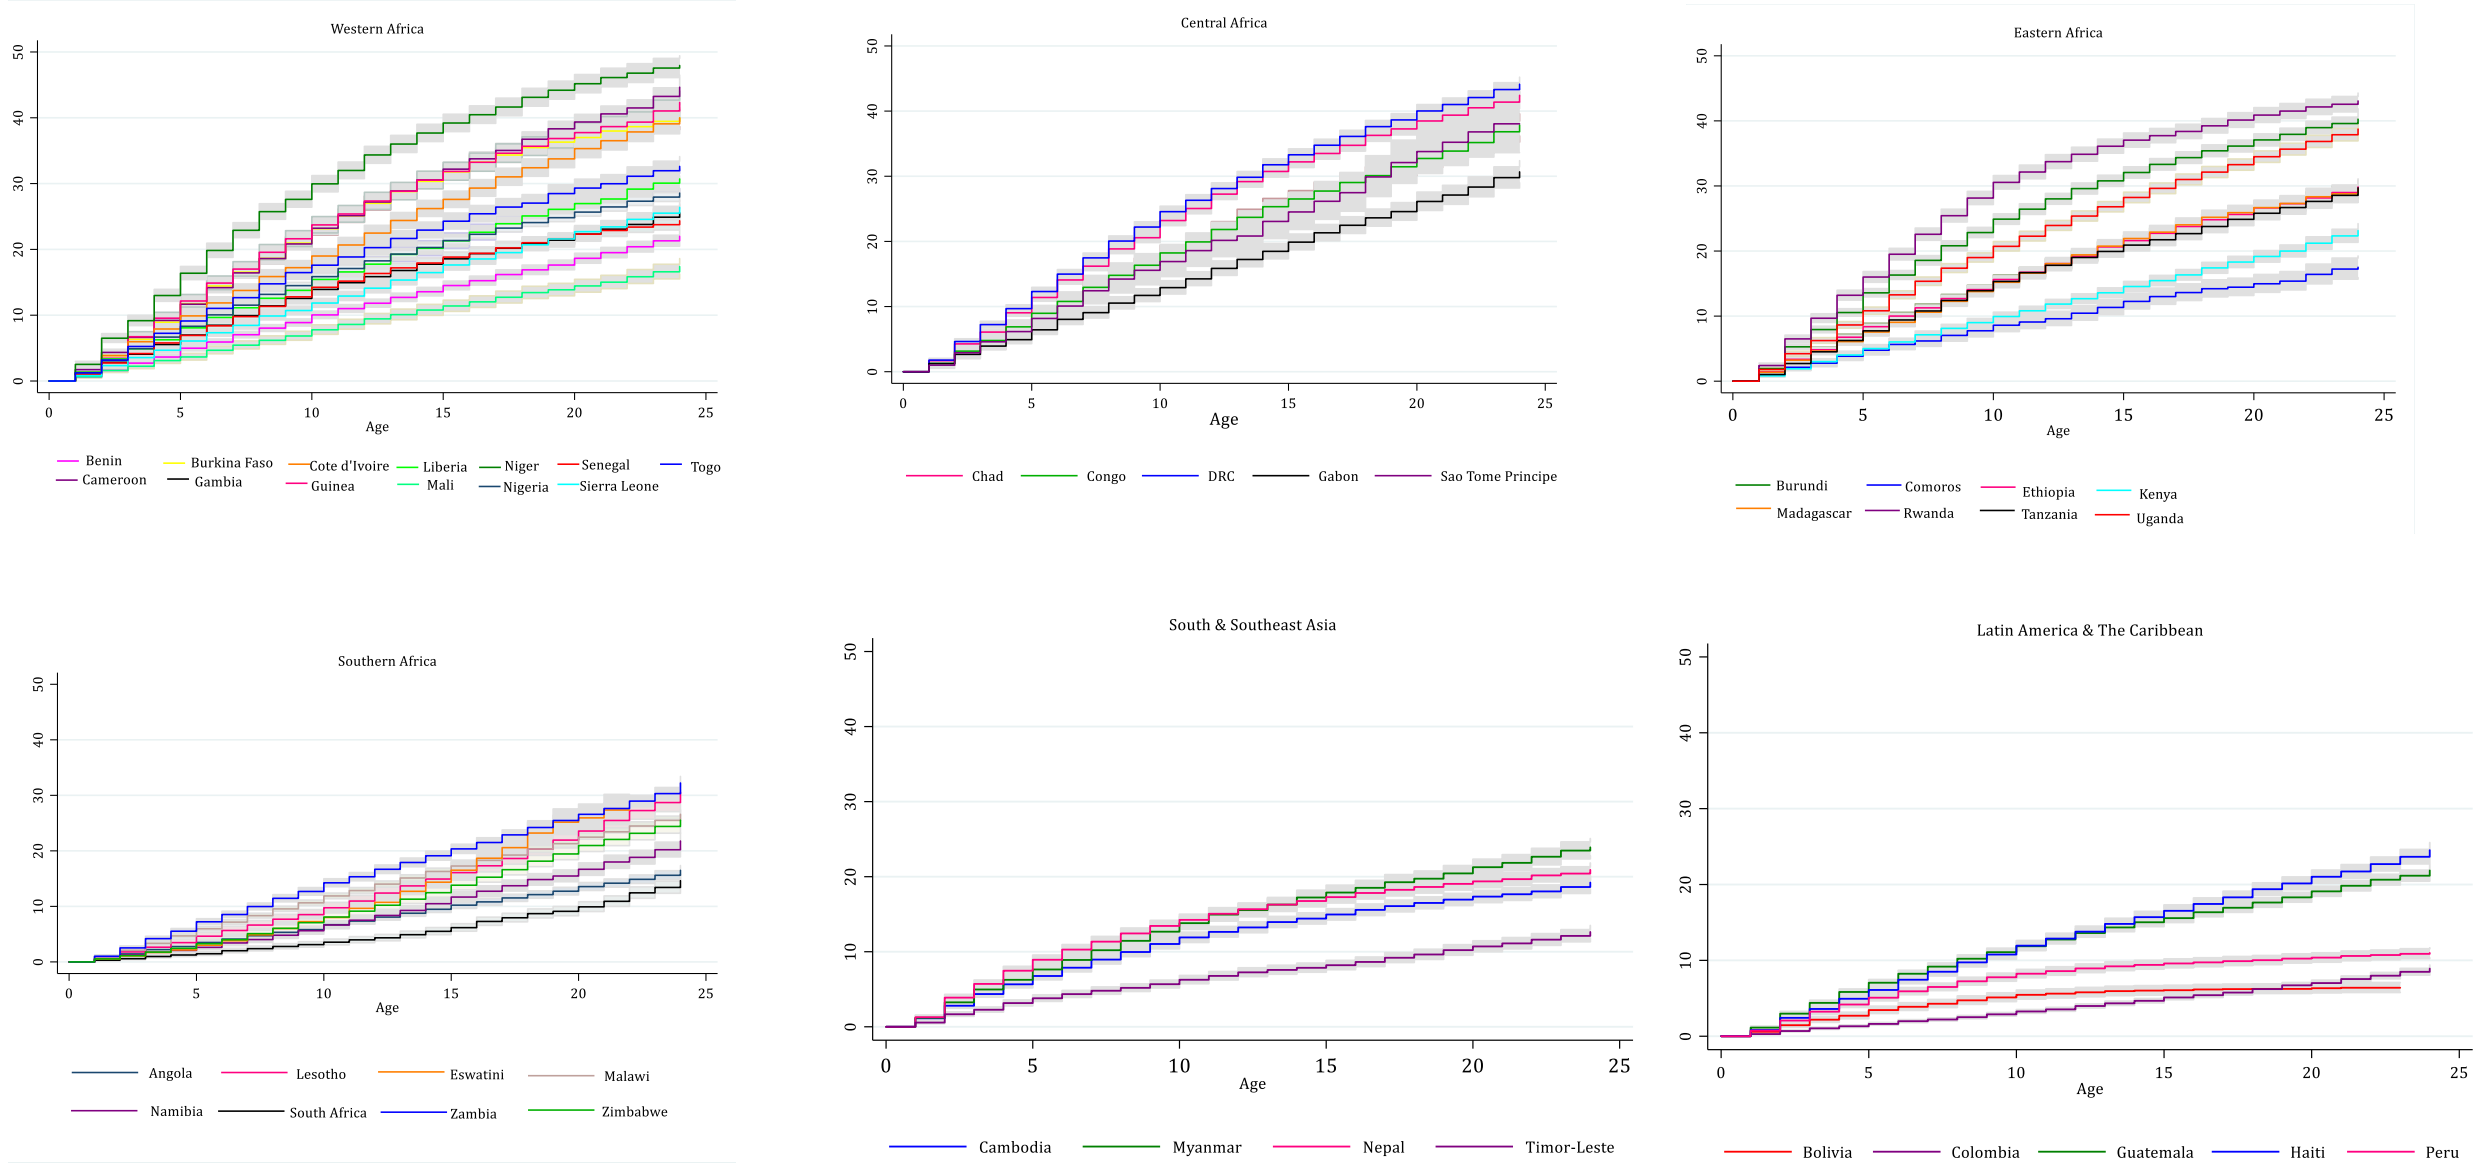

Supplement: pone.0236498.s003.pdf [file pone.0236498.s003.pdf]
